# Supplementary material
Source: MDPI journal article supplement (https://www.mdpi.com/2073-4344/12/10/1207)
Supplement: s1 [file s1]

Supplementary Materials

# Sulfate Decelerated Ferrous ion-Activated Persulfate Oxidation of Azo Dye Reactive Brilliant Red: Influence Factors, Mechanisms, and Control Methods

Chenliu Tang, Zhicheng Long, Yidan Wang, Dongze Ma and Xiaobiao Zhu \*

Department of Environmental Science and Engineering, College of Chemical Engineering, Beijing University of Chemical Technology, Beijing 100029, China

\* Correspondence: zhuxiaobiao@mail.buct.edu.cn; Tel.: +86-10-64427356

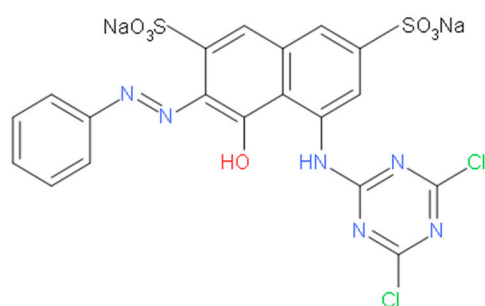

**Figure S1.** Molecular structure formula of reactive brilliant red X-3B.

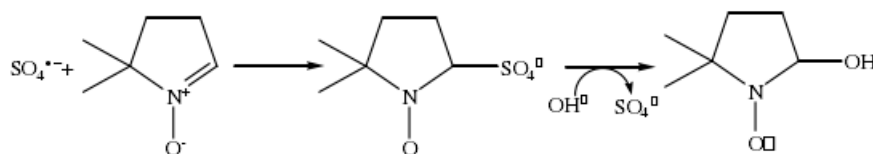

**Figure S2.** Conversion of DMPO-SO<sub>4</sub> to DMPO-OH.

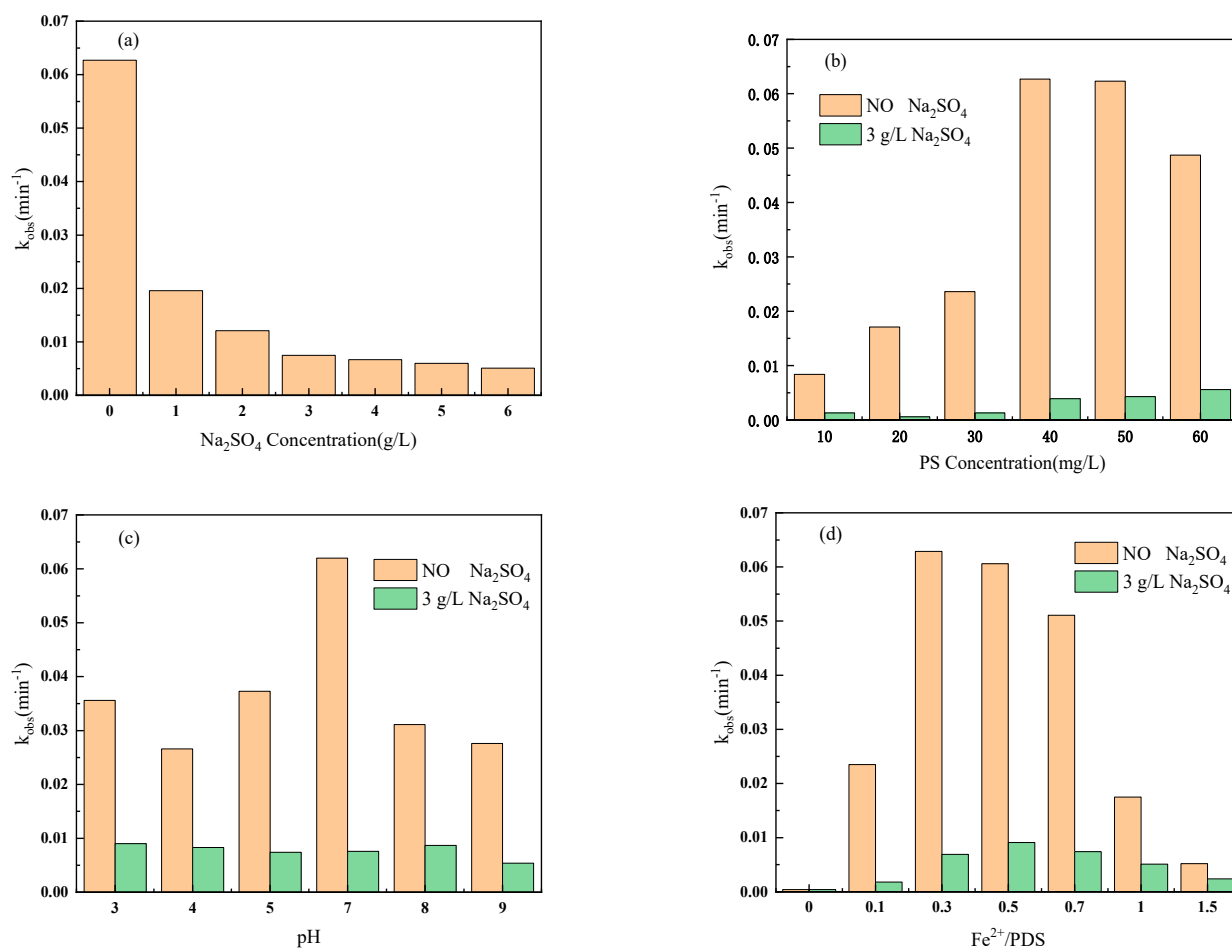

**Figure S3.** Variation of the chemical reaction rate constant  $k_{obs}$  for the system under different reaction conditions: (a)  $\text{Na}_2\text{SO}_4$  concentration, (b) PS concentration, (c) pH, (d)  $\text{Fe}^{2+}/\text{PDS}$ .

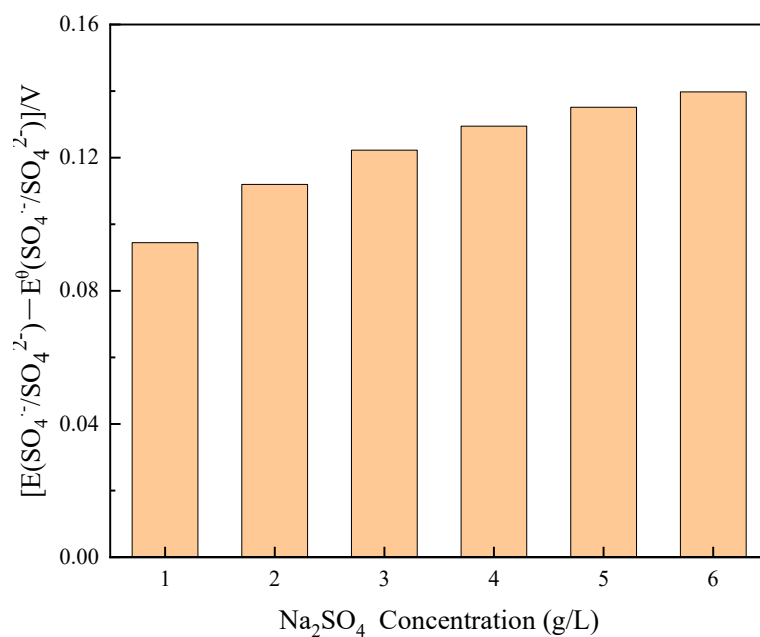

**Figure S4.** Variation of  $[E(\text{SO}_4^{\cdot-}/\text{SO}_4^{2-}) - E^0(\text{SO}_4^{\cdot-}/\text{SO}_4^{2-})]/V$  of the system at different  $\text{Na}_2\text{SO}_4$  concentrations.
